# Supplementary material for: Nitrogen Use Efficiency in Parent vs. Hybrid Canola under Varying Nitrogen Availabilities
Source: MDPI journal article supplement (doi:10.3390/plants10112364), 2021-11-02
Supplement: s1 [file s1]

## Supplementary Material

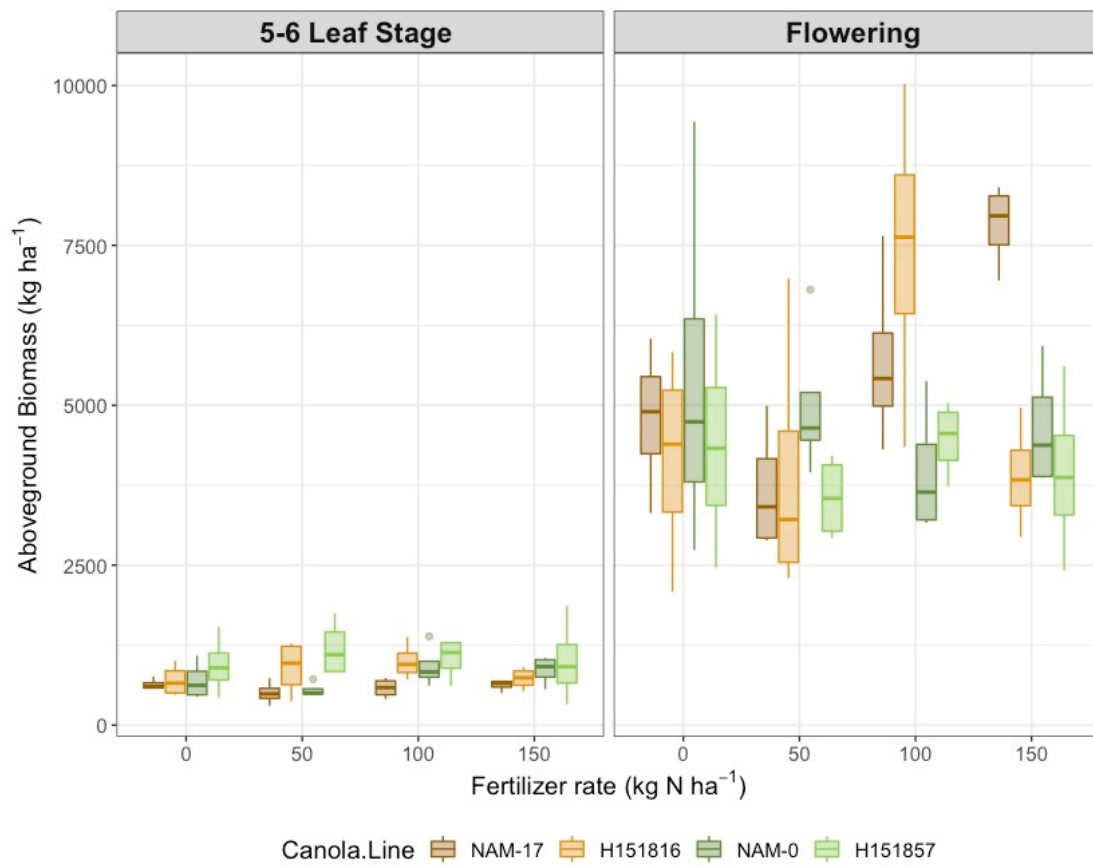

**Figure S1|** Aboveground plant biomass over four diverse canola varieties and four varying N treatment rates at two phenological growth stages (5-6 leaf stage and flowering, n = 4).

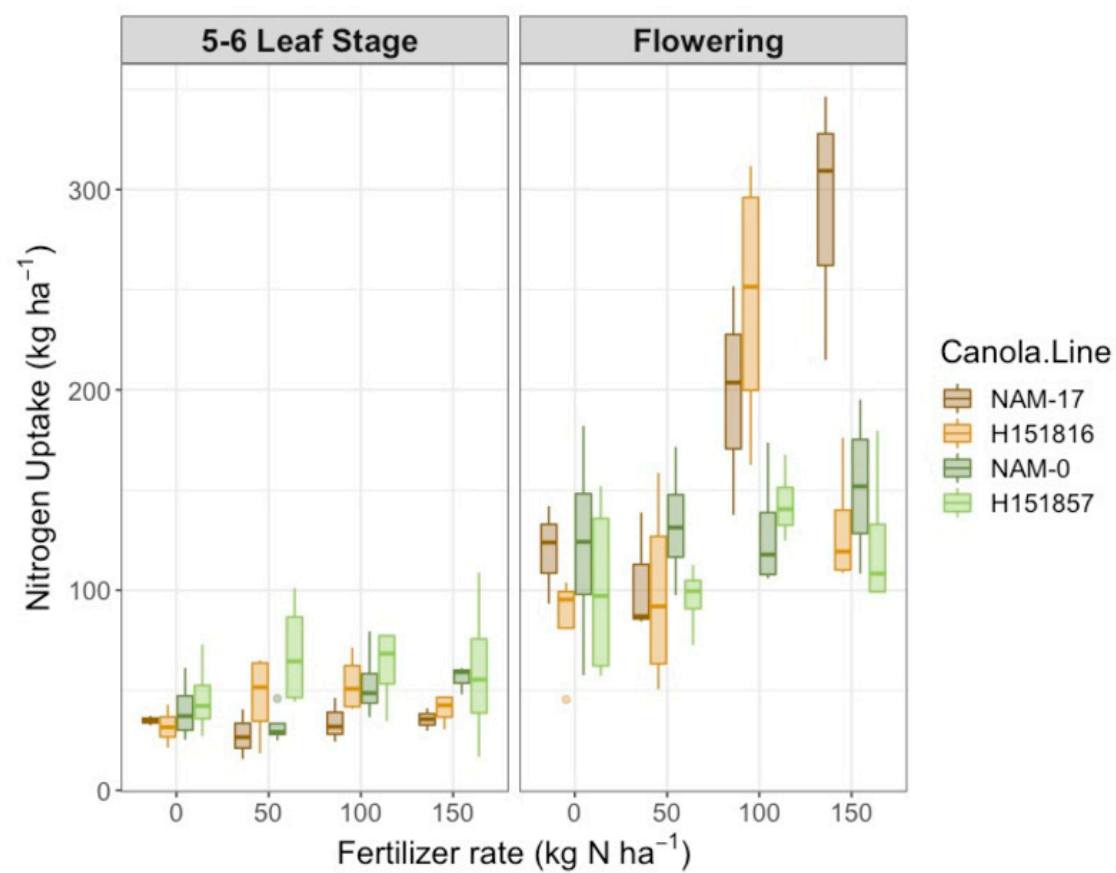

**Figure S2I** Canola N uptake over four diverse canola varieties and four varying N treatment rates at two phenological growth stages (5-6 leaf stage and flowering, n = 4).

**Table S1** Meteorological condition during the canola growing for 2018 season. Meteorological data obtained from Environment and Climate Change Canada [https://climate.weather.gc.ca/climate\\_data](https://climate.weather.gc.ca/climate_data).

| Growing months in 2018 | Broad Sampling stages  | Mean daily precipitation (mm) | Mean daily temperature (°C) |
|------------------------|------------------------|-------------------------------|-----------------------------|
| May                    | Seeding                | 35.0                          | 14.3                        |
| June                   | 5-6 leaf stage         | 19.9                          | 17.3                        |
| July                   | Flowering              | 31.1                          | 18.7                        |
| August                 | Physiological maturity | 17.2                          | 17.1                        |
| September              | Harvest maturity       | 37.1                          | 7.4                         |

**Table S2** Physio-chemical properties of study site prior to seeding in 2018.

| Variables                              | Llewellyn Farm 2018                            |
|----------------------------------------|------------------------------------------------|
| <b>Soil Properties (0-15 cm depth)</b> |                                                |
| Soil pH                                | 7.3                                            |
| Organic matter (%)                     | 5.5                                            |
| Electrical conductivity (dS/m)         | 0.6                                            |
| Available N (ppm) <sup>1</sup>         | 12.0**                                         |
| Available P (ppm)                      | 23.0**                                         |
| Available K (ppm)                      | 780.0 <sup>†</sup>                             |
| Available S (ppm)                      | 8.0•                                           |
| Available Ca (ppm)                     | 5900.0•                                        |
| Available Mg (ppm)                     | 960.0•                                         |
| Available Na (ppm)                     | 27.0 <sup>‡</sup>                              |
| <b>Seeding Factors</b>                 |                                                |
| Preceding crop                         | Wheat                                          |
| Seeding date                           | Julian day 147                                 |
| Emergence rate                         | 30-100% emergence; 51% average emergence       |
| Days to harvest maturity               | 77-85 day range after seeding; 80 days average |

<sup>‡</sup> Deficient, \*\* Marginal, • Optimum, <sup>†</sup> Excess in relation to fertility recommendations for optimal yield. <sup>1</sup> Available N was examined at two depths pre-seeding, with 12 ppm (26.9 kg ha<sup>-1</sup>) available N at the 0-15 cm depth and 8 ppm (56.0 kg ha<sup>-1</sup>) at the 15-60 cm depth.
